# Supplementary material
Source: PubMed Central journal article supplement (PMC8426131)
Supplement: NIHMS855562-supplement-Supplementary_Tables.pdf [file NIHMS855562-supplement-Supplementary_Tables.pdf]

**Supplementary Tables:**

**Table SI: Recombinant Ebola virus antigens elicit serum antibody reactive with homologous antigens and whole virus<sup>a</sup>**

| Antigen <sup>d</sup> | Adjuvant              | Recombinant antigen <sup>b</sup> |             |             | Irradiated Ebola virus <sup>c</sup> |             |             |
|----------------------|-----------------------|----------------------------------|-------------|-------------|-------------------------------------|-------------|-------------|
|                      |                       | Post dose 1                      | Post dose 2 | Post dose 3 | Post dose 1                         | Post dose 2 | Post dose 3 |
| GP                   | GPI-0100 <sup>e</sup> | 250                              | 27,858      | 64,000      | <100                                | 1397        | 3363        |
| GP                   | ISA-51                | <250                             | 6964        | 16,000      | <100                                | 155         | 580         |
| VP24                 | GPI-0100              | <250                             | 16,000      | 36,758      | <100                                | <100        | <100        |
| VP24                 | ISA-51                | <250                             | 9190        | 36,758      | <100                                | 124         | <100        |
| VP40                 | GPI-0100              | 2297                             | 147,033     | ≥ 256,000   | <100                                | 37,710      | 30,271      |
| VP40                 | ISA-51                | 758                              | 48,503      | ≥ 256,000   | <100                                | 15,659      | 30,271      |
| NONE                 | GPI-0100              | <250                             | <250        | <250        | <100                                | <100        | <100        |
| NONE                 | ISA-51                | <250                             | <250        | <250        | <100                                | <100        | <100        |

<sup>a</sup> ELISA antibody titers expressed as geometric mean of individual animal serum dilutions yielding an OD of 0.2 above background

<sup>b</sup> ELISA plates coated with homologous recombinant antigens

<sup>c</sup> ELISA plates coated with irradiated Ebola virus

<sup>d</sup> 10 µg of each antigen used for immunization by s.c. route

<sup>e</sup> 100 µg of GPI-0100 used
